## PATHOLOGICAL SOCIETY.

At the meeting in November, Dr. Richard Quain brought forward two cases of Leucocythemia. The first was the case of a man thirty-seven years old, who had enlargement of the spleen and liver, also of the glands of the neck and axilla, and other parts of the body. The white cells in the blood were very numerous, and contained nuclei. The second case was that of a woman, forty-five years of age, who also had enlargement of the liver and spleen.

---

## OBITUARY.

IN DR. ALGERNON MANTELL, who died on the 10th of November, the science of microscopy has lost a most ardent cultivator. He early perceived the value of the microscope as an instrument of geological research, and many of his papers indicate how successfully he used this instrument. One of his works, entitled 'Thoughts on Animalcules,' was devoted to a subject entirely microscopical, and displays an intimate knowledge of the structure and habits of many of the recent species of Infusoria. As a scientific teacher and cultivator of geology and its kindred sciences, Dr. Mantell's loss will be severely felt.

---
